# Supplementary material for: Informal Caregivers’ Experiences and Perceptions of a Web-Based Peer Support Network: Mixed-Methods Study
Source: PubMed Central journal article supplement (PMC6134228; doi:10.2196/jmir.9895), 2018-08-28

## Multimedia Appendix: Military and Veteran Caregiver Network Website Screenshots

This is a Multimedia Appendix to a full manuscript published in the J Med Internet Res. For full copyright and citation information see <http://dx.doi.org/10.2196/jmir.xxxx>.

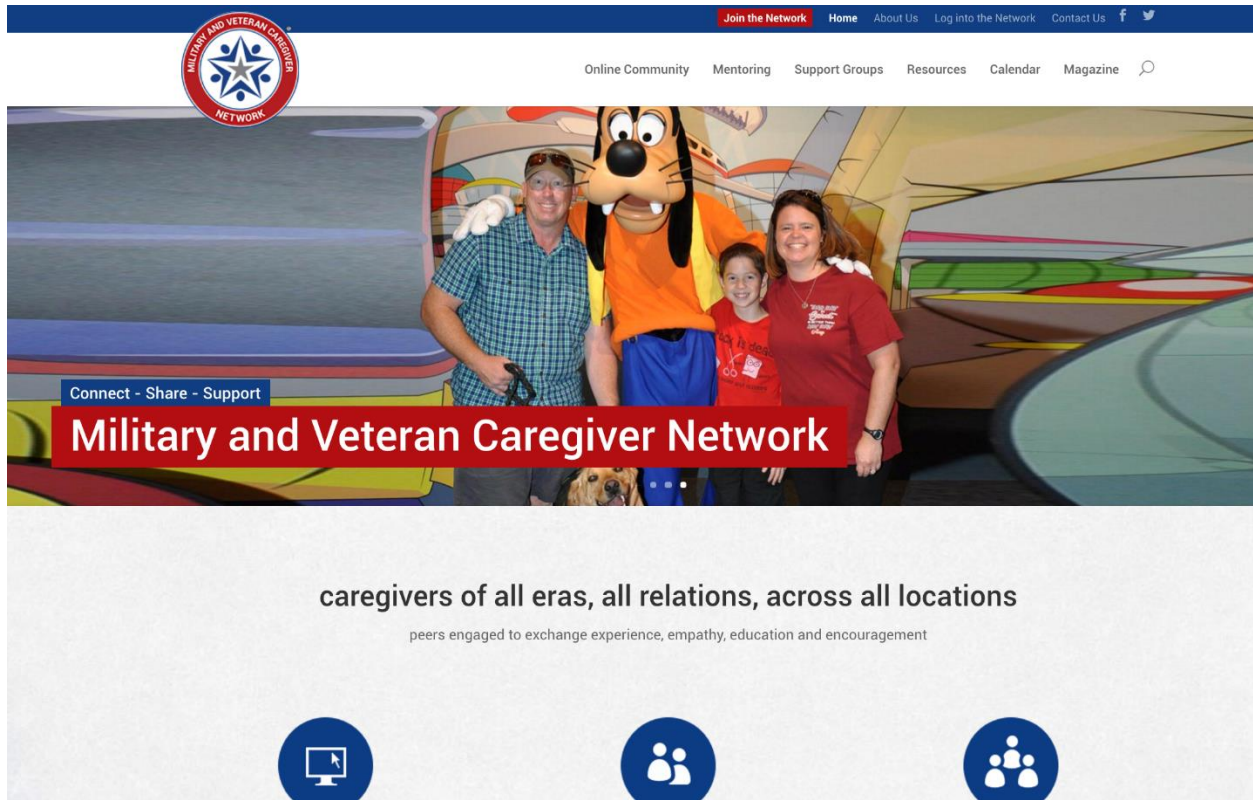

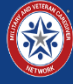

### Caregiver Login

Please use your Community username and password to log in to the Online Peer Support Community

Caregiver Member Login

MVCN Employee Login

[Back to MVCN Home](#)

### I Am Not A Member

Our Online Peer Support Community offers you a secure and confidential place for you and your Military and Veteran Caregiver peers to connect with one another.

It is monitored and moderated by trained caregiver peers and security and safety are the highest priority.

Membership is free and access is available upon review of your membership request for security purposes.

[Request To Become A Member](#)

[What is the Online Peer Support Community?](#)

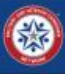

- Messages
- Feed
  - What I Follow
  - To Me
  - Bookmarked
- People
- Groups
- Files
- Topics

Post File Link  
Share an update, @mention someone... Share

Show All Updates

(TAPS) posted a link.

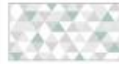

**What Successful Caregivers Do Differently**  
<http://www.huffingtonpost.com>  
You know those caregivers who keep it all together? Despite the responsibilities and challenges of caregiving, they still have time to pursue their ow...

Comment Like Share Yesterday at 6:56 PM

(Caregiver) likes this

Sexual Health and Intimacy — (TAPS) posted a link.

**PTSD, TBI, Sex and Relationships**  
<https://leatherwar.org/2014/01/23/ptsd-tbi-sex-and-relationships/>

Recommendations More

- Popular file  
Follow
- (Caregiver)  
Similar to items you follow  
Follow
- (Caregiver)  
Similar to items you follow  
Follow
- (Caregiver)  
Similar to items you follow  
Follow

Trending Topics All

- #TBI
- #sexualhealth
- #PTSD
- Intimacy
- Military Scholarships

### Groups

- Recently Viewed
- My Groups
- Active Groups
- My Archived Groups

### Recently Viewed Groups

| Type a Group Name...                                                                                                                                                                                                                                              |               |            |
|-------------------------------------------------------------------------------------------------------------------------------------------------------------------------------------------------------------------------------------------------------------------|---------------|------------|
| Name                                                                                                                                                                                                                                                              | Last Activity | Membership |
|  <b>Hidden Heroes Caregiver Community</b><br>This is a group for those caregivers in the Elizabeth Dole Foundation's Hidden Heroes c...<br>63 Members<br>Owner [redacted] (TAPS) | 5/10/2016     | ✓ Member   |
|  <b>Children and Youth</b><br>The Children and Youth group is a place for care and concern of children in the role of...<br>39 Members<br>Owner [redacted] (TAPS)                | 5/6/2016      | ✓ Member   |
|  <b>Paralyzed Veterans of America</b><br>The Paralyzed Veterans of America, a congressionally chartered veterans service organiz...                                              | 5/5/2016      | ✓ Member   |

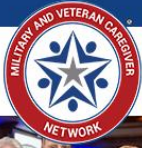

[Join the Network](#)

[Home](#)

[About Us](#)

[Log into the Network](#)

[Contact Us](#)

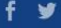

[Online Community](#)

[Mentoring](#)

[Support Groups](#)

**[Resources](#)**

[Calendar](#)

[Magazine](#)

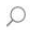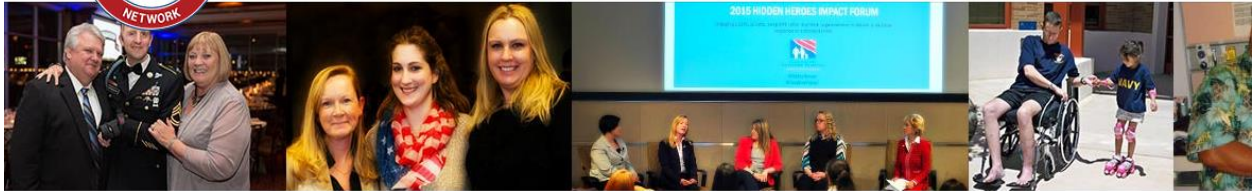

## RESOURCE LIBRARY

For immediate help call 1-800-273-8255 (Press 1), chat, or text 838255 for 24/7/365 support or see our [crisis resources](#).

### Benefits & Compensation

Find information on assistance for military and veteran caregivers and families including eligibility and federal/state/local payments, disability, insurance, and more.

### Children & Youth

Find information about assistance for military and veteran caregiver and family dependents from 0-21 years of age including behavioral and emotional challenges, communication, educational tutoring, scholarships, disabilities and more.

### Community Support at Home

Find information on services for military and veteran caregivers and families from public, private, non-profit, faith-based, and military and veteran organizations close to home.

### Education & Training

Find information on academic and vocational opportunities for military and veteran caregivers and families including

### Employment & Workplace Support

Find information on jobs, careers and employers for military and veteran caregivers and families including job seeking, resumes,

### Financial & Legal Issues

Find information on personal financial management for military and veteran caregivers and families including

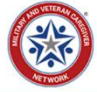

# We Care

MVCN Magazine by and for Caregivers  
Fall 2015

Caregiver Stories

KidsCare

Dear WeCare

Caregiver Reviews

Caregiver News

Caregiver Partners

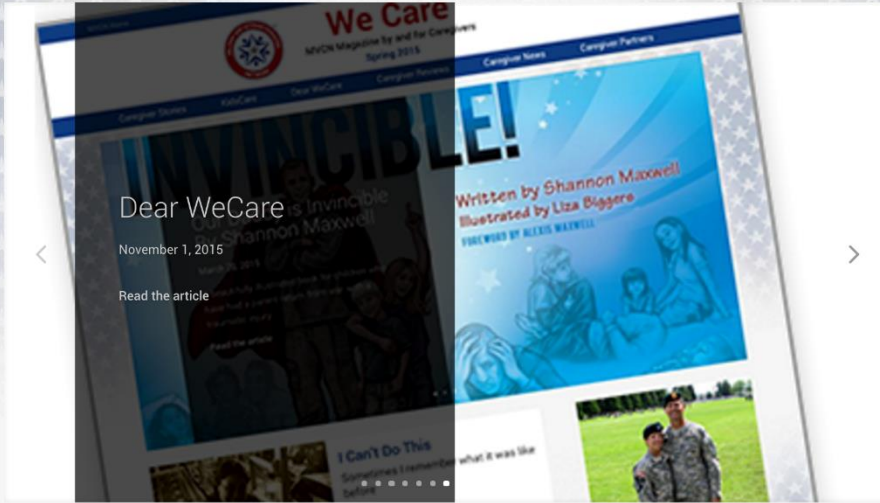

Supplement: jmir_v20i8e257_app1.pdf [file jmir_v20i8e257_app1.pdf]
